# Supplementary material for: Design of Peptidomimetic Functionalized Cholesterol Based Lipid Nanoparticles for Efficient Delivery of Therapeutic Nucleic Acids
Source: MDPI journal article supplement (doi:10.3390/molecules24183413), 2019-09-19
Supplement: s1 [file s1]

## Supplementary Materials

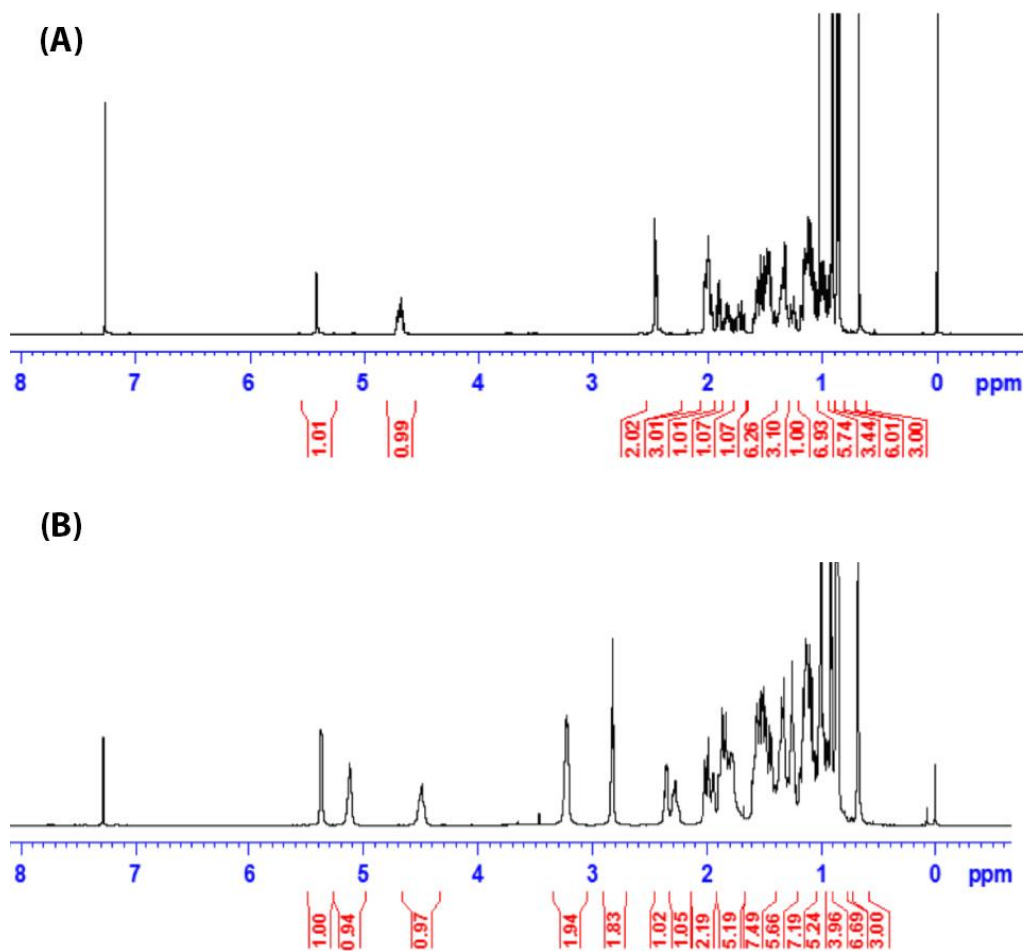

**Figure S1.**  $^1\text{H}$  NMR spectrum of cholesterol chloroformate (A) and intermediate 1 (B) in  $\text{CDCl}_3$ .

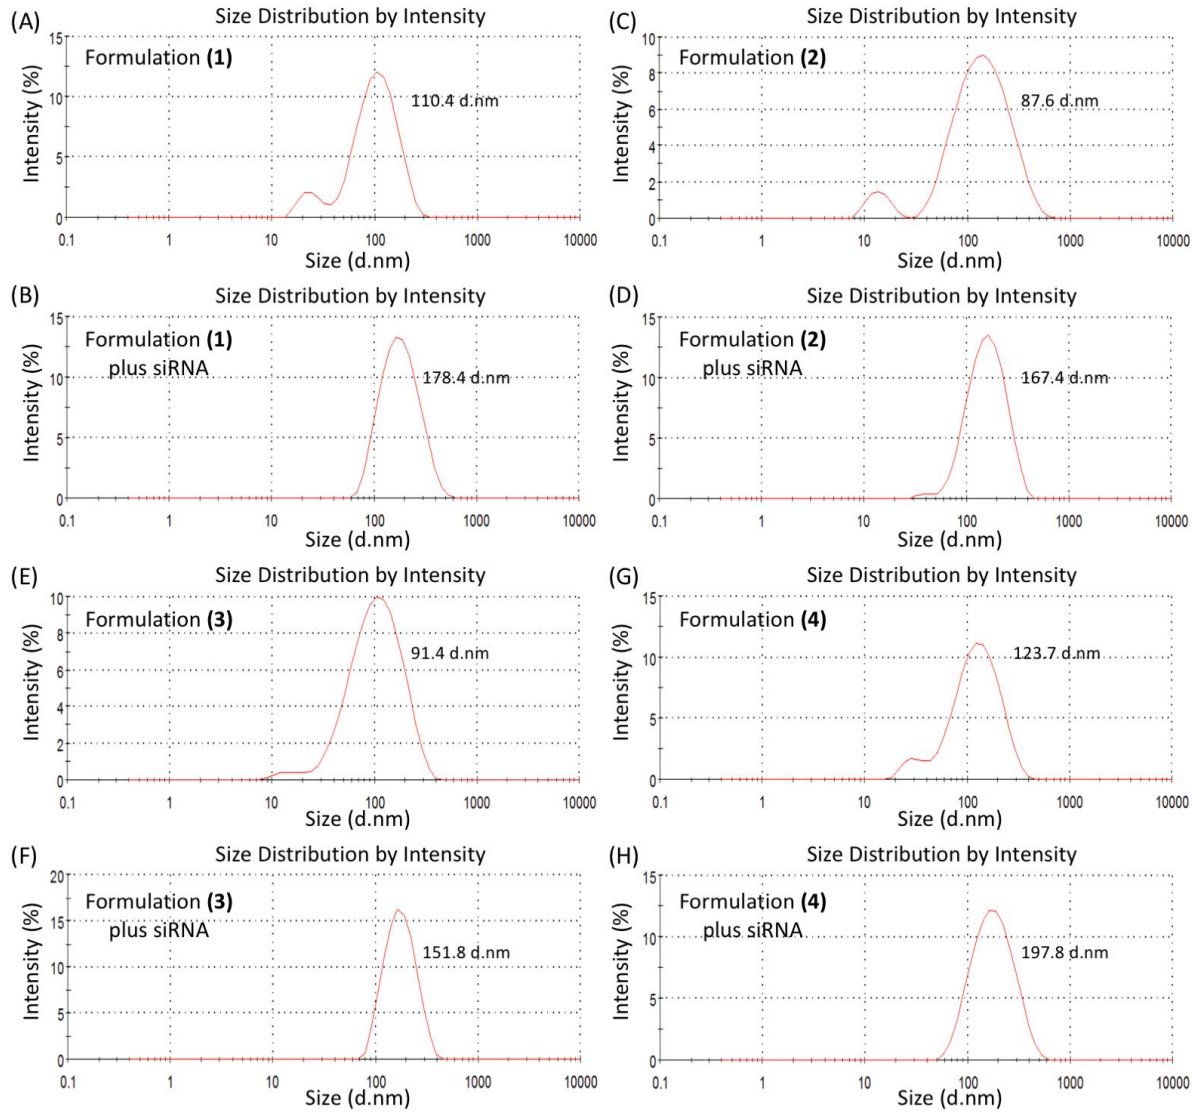

**Figure S2.** Size distribution of Chorn3 LNPs before and after complexing with siRNA.

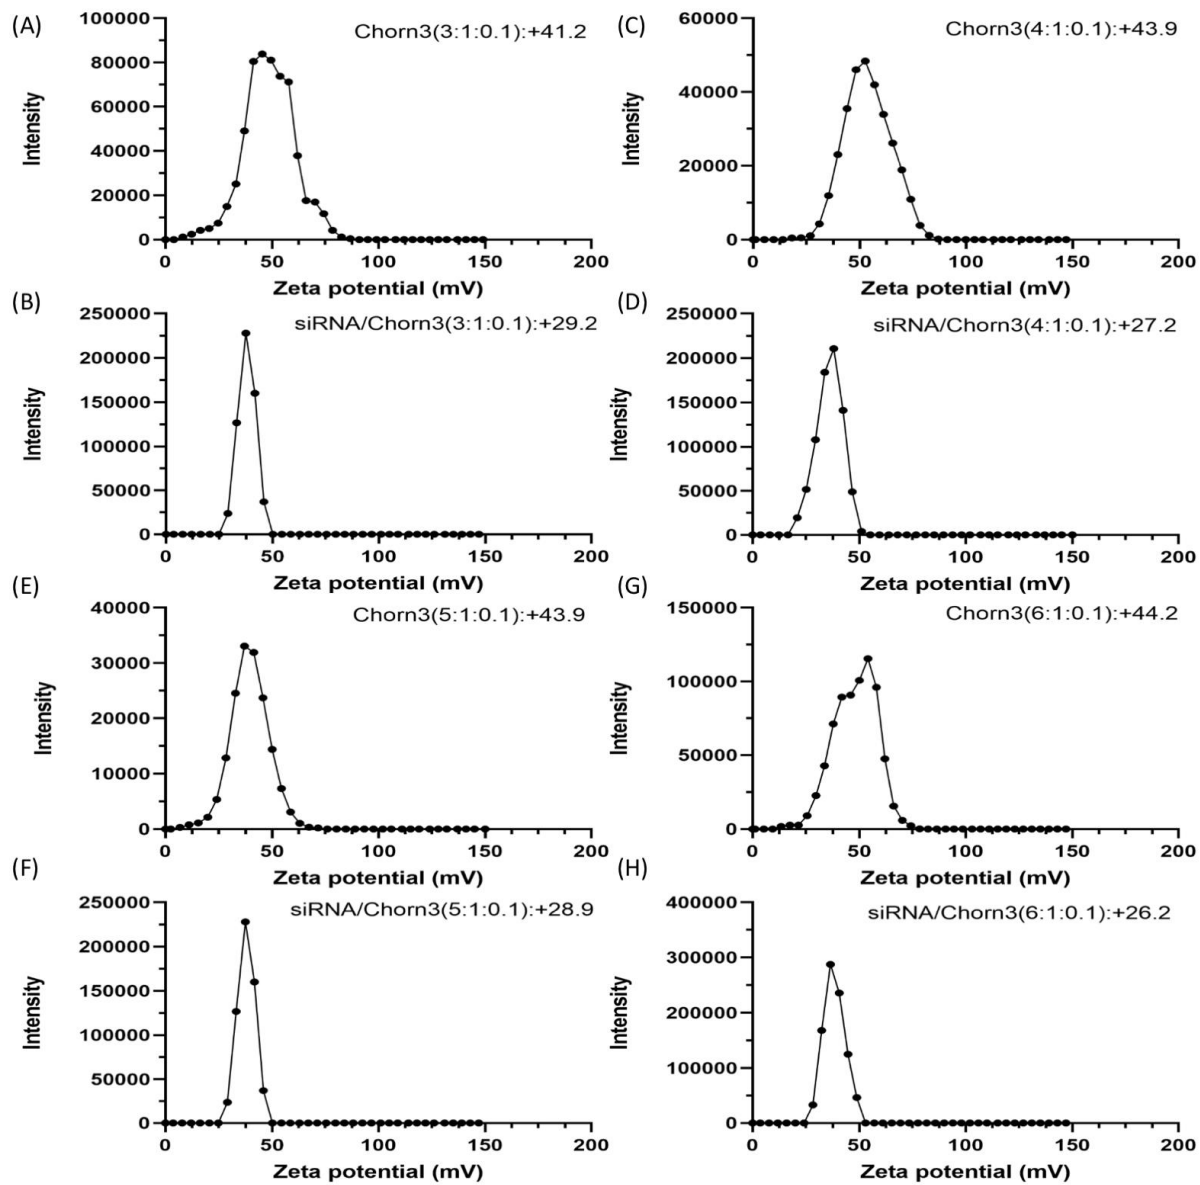

**Figure S3.** Zeta potential of Chorn3 LNPs before and after complexing with siRNA.
